# Supplementary material for: Amelioration of Enterotoxigenic Escherichia coli-induced&nbsp;disruption of intestinal epithelium by Manno-oligosaccharide&nbsp;in weaned pigs
Source: Research Square preprint supplement (doi:10.21203/rs.3.rs-120366/v1), 2020-12-04
Supplement: Supplementary file 1 [file 165f52ced9f60b3506b4b13d.docx]

Table S1. Sequences of primers for genes related to inflammation,antioxidant and apoptosis

| GENE | Primer sequence (5’ –3’) | Annealing temperature (℃) | Product size (bp) |
| --- | --- | --- | --- |
| β-Actin | F: TGGAACGGTGAAGGTGACAGC | 62.84 | 177 |
| R: GCTTTTGGGAAGGCAGGGACT | 62.90 |
| TLR4 | F: TTACAGAAGCTGGTTGCCGT | 59.89 | | 152 | | --- | |  | |
| R: TCCAGGTTGGGCAGGTTAGA | 60.47 |
| MYD88 | F: CCATTCGAGATGACCCCCTG | 59.89 | 184 |
| R: TCAGCAATGGACCAGACGCAG | 62.97 |
| NF-kB | F: GTGTGTAAAGAAGCGGGACCT | 60.27 | 139 |
| R: CACTGTCACCTGGAAGCAGAG | 60.61 |
| IL-1β | F: CAGCTGCAAATCTCTCACCA | 58.18 | 85 |
| R: TCTTCATCGGCTTCTCCACT | 58.44 |
| TNF-α | F: CGTGAAGCTGAAAGACAACCAG | 61.03 | 121 |
| R: GATGGTGTGAGTGAGGAAAACG | 59.52 |
| IL-6 | F: TGGCTACTGCCTTCCCTACC | 60.98 | 153 |
| R: CACACATCTCCTTTCTCATTGC | 57.65 |
| Ho-1 | F: CGCTCCCGAATGAACAC | 55.66 | 112 |
| R: GCTCCTGCACCTCCTC | 55.92 |
| NR-F2 | F: GCCCCTGGAAGCGTTAAAC | 59.12 | 67 |
| R: GGACTGTATCCCCAGAAGGTTGT | 61.65 |
| BAX | F: AAGCGCATTGGAGATGAACT | 57.88 | 121 |
| R: TGCCGTCAGCAAACATTTC | 57.14 |
| Bcl-2 | F: ATGTGTGTGGAGAGCGTCAA | 59.61 | 142 |
| R: GCCCATACAGCTCCACAAAG | 58.90 |
| *Caspase3* | F: CGGAATGGCATGTCGATCTGGT | 63.00 | 353 |
| R: ACTGTCCCGTCTCAATCCCAC | 61.78 |
| Caspase-8 | F: TCTGCCGGACTGGATGTGATT | 61.52 | 167 |
| R: TCTGAGCGTTGCTGGTCACAC | 63.14 |
| Caspase-9 | F: AATGCCGATTTGGCTTACGT | 58.56 | 195 |
| R: CATTTGCTTGGCAGTCAGGTT | 59.66 |
| PBD114 | F: TTGGTGGATCCTGAACGATGCT | 62.01 | 130 |
| R: CTTCTTCAAACGCCCTCTGAATGC | 62.67 |
| PBD119 | F: GCACACTTGAAGAGGTCGCCA | 63.16 | 121 |
| R: ATGCTGGCGAAAGGGTTGGT | 62.71 |

tumor necrosis factor, TNF-α; interleukin-1β, IL-1β; interleukin-6, IL-6; toll-like receptor 4, TLR4;, myeloid differentiation factor 88, MyD88; nuclear factor-κB, NF-κB; nuclear factor erythroid-derived 2-related factor 2, Nrf2; heme oxygenase-1, HO-1; B-cell lymphoma-2-associated X protein, BAX; B-cell lymphoma-2, BCL-2; cysteinyl aspartate-specific proteinase-3 (caspase-3), caspase-8 and caspase-9, Porcine β-defensin (PBD)114 and PBD129
